# Supplementary material for: Fluorescence resonance energy transfer (FRET)-based nanoarchitecture for monitoring deubiquitinating enzyme activity
Source: Royal Society of Chemistry journal article supplement (doi:10.1039/c9cc09808a), 2020-01-01
Supplement: c9cc09808a1.pdf [file c9cc09808a1.pdf]

## **Fluorescence Resonance Energy Transfer-Based Nanoarchitectures for Monitoring Intracellular Deubiquitinating Enzyme Activity**

Yan-Yan Liang<sup>a,1</sup>, Jie Zhang<sup>b,c,1</sup>, Hui Cui<sup>a</sup>, Zhen-Shu Shao<sup>b</sup>, Chen Cheng<sup>b</sup>, Yue-Bo Wang<sup>\*a</sup>, Huai-Song Wang<sup>\*b</sup>

---

<sup>a</sup> School of Chemistry and Chemical Engineering, Shandong University of Technology, Zibo 255000, China

<sup>b</sup> Department of Pharmaceutical Analysis, China Pharmaceutical University, Nanjing 210009, China

<sup>c</sup> Tianjin Key Laboratory of Food Biotechnology, Tianjin University of Commerce, Tianjin 300134, China

\* Corresponding Author:

ybwang@sdut.edu.cn (Yue-Bo Wang);

wanghuaisong@cpu.edu.cn; wanghuai1234@gmail.com (Huai-Song Wang)

<sup>1</sup> The first two authors contributed equally to this work.

## Materials and reagents

Cetyltrimethylammonium bromide (CTAB), tetraethoxysilane (TEOS), glutathione (GSH),  $\text{TbCl}_3 \cdot 6\text{H}_2\text{O}$ , polyethylenimine (PEI), 3-(triethoxysilyl)propyl isocyanate were purchased Alfa Aesar. Adenosine triphosphate (ATP), 1,3-diphenyl-1,3-propanedione (DBM), human serum albumin (HSA), 1,10-Phenanthroline-5-amine, 1-ethyl-3-(dimethyl-aminopropyl) carbodiimide hydrochloride (EDC) and *N*-hydroxyl succinimide (NHS) were bought from Sigma-Aldrich (USA). UCH-L1 inhibitor was purchased from Aladdin. Ubiquitin-rhodamine (Ub-R) and UCH-L1 were purchased from Enzo Life Sciences, Inc.. All aqueous solutions were prepared from deionized water ( $18 \text{ M}\Omega \cdot \text{cm}^{-1}$ ). Unless otherwise stated, all chemical materials were purchased from commercial sources and used without further purification.

## Apparatus and measurements

The morphologies of nanoparticles were characterized by scanning electron microscope (SEM, S-4800, Japan) and transmission electron microscopy (TEM, JEM-200CX, Japan). The X-ray photoelectron spectra (XPS) were tested on a PHI 5000 Versaprobe instrument (UIVAC-PHI, Japan). UV-vis absorption spectra were performed on a UV3600 spectrophotometer (Shimadzu, Japan). Fourier transform infrared (FTIR) spectra were collected on a Nicolet 6700 FTIR spectrometer (Thermo Scientific, USA). Fluorescence spectra were recorded on a RF-5301PC spectrophotometer (Shimadzu, Japan). Fluorescence lifetimes spectra were obtained on a FLS920 Fluorescence Lifetime and Steady State Spectrometer (Edinburgh, UK).

## EXPERIMENTAL SECTION

### Synthesis of Phen-Si.

Typically, 1,10-Phenanthroline-5-amine (1.02 mmol) was added into chloroform (30 mL), and the mixture was ultrasonicated for 5 min. Then, 3-(triethoxysilyl)propyl isocyanate (1.7 mL) was added into the mixture. After stirred for 30 min, the chloroform was removed under vacuum at 25 °C. The remaining yellow viscous mixture was stirred for another 20 h at 80 °C. After the reaction, cold hexane was added to the mixture and a slightly yellow precipitate was obtained. The precipitate was then

dissolved in methanol and filtered. The methanol was removed by evaporation, and cold hexane was used to reprecipitate the production (Phen-Si). The prepared Phen-Si was dried at 60 °C under vacuum.

### **Synthesis of mesoporous silica nanoparticles (MSNs).**

In a typical synthesis procedure, CTAB (52 mg) was dissolved into 50 mL of H<sub>2</sub>O/EtOH solution with volume ratio of 0 : 1, 1 : 1 or 1 : 4. After ultrasonicated for 10 min, NH<sub>3</sub>·H<sub>2</sub>O solution (0.3 M) was added into the solution to adjust the pH value of the solution to 10.9. The solution was then stirred under 45 °C, and 10 mL of TEOS ethanol solution, in which 1 mL TEOS has been dissolved in 48 mL ethanol, was added dropwise in 10 min. The reaction was performed for 1 h. Then milk-white MSNs were collected by centrifugation. For removing the surfactant, the MSNs were refluxed in a solution consisting of 30 mL of ethanol and 3 mL of hydrochloric acid under 75 °C for 24 h. The MSNs were collected by centrifugation and washed 3 times with water and ethanol respectively. The final MSNs were dried for 6 h at 120 °C in vacuum. The MSNs were named as MSN0/1, MSN1/1 and MSN1/4 respectively according to the reaction solvent.

### **Preparation of MSN-Tb.**

The MSN1/4 nanoparticles (500 mg) were dispersed in a solution of dry dichloromethane (10 mL) containing Phen-Si (2 mg, 8 mg or 16 mg). The reaction was performed at 90 °C for 12 h under a nitrogen atmosphere and stirring. Then, the prepared MSN-Phens were collected by filtration, rinsed with ethanol and dried under vacuum at 50 °C. The prepared MSN-Phens were named as MSN-Phen1, MSN-Phen2 and MSN-Phen3 according to the amount of Phen-Si: 2 mg, 8 mg and 16 mg respectively.

For preparing MSN-Tbs, the prepared MSN-Phen1, MSN-Phen2 and MSN-Phen3 were respectively mixed with TbCl<sub>3</sub>·6H<sub>2</sub>O (20 mg) in 50 mL ethanol and refluxed at 80 °C for 2 h under N<sub>2</sub> protection. Then, 1,3-diphenyl-1,3-propanedione (40 mg) was added into the suspension, and the reaction was carried out for another 24 h. After cooling, the precipitate was filtered. The prepared MSN-Tb1, MSN-Tb2 and MSN-Tb3 particles were washed with ethanol respectively, and dried in vacuum.

### **Modification of Ub-R on the surface of MSN-Tb2**

Firstly, the PEI coating procedure was carried out by suspending 100 mg of MSN-Tb2 in PEI aqueous solution (10 wt %). The mixture was stirred at room temperature for 24 h. After PEI adsorption, the PEI modified MSN-Tb2 (MSN-Tb-PEI) was washed with deionized water.

The modification of Ub-R was carried out as follows: 0.1 mmol EDC and 0.25 mmol NHS were dissolved in 10 mL PBS (pH 7.4) containing 50  $\mu$ M Ub-R. The mixture was stirred at 25 °C for 20 min to activate the carboxylic group of Ub-R. Then, 50 mg MSN-Tb-PEI was dispersed in the solution, and stirred for 24 h at 25 °C. The prepared MSN-Tb-UbR was collected by centrifuge at 12000 rpm, and re-dispersed in PBS (pH 7.4) for further experiment.

### **Fluorescent sensing**

Typically, UCH-L1 with different concentrations was incubated with MSN-Tb-UbR (5 mg·mL<sup>-1</sup>) for 30 min at room temperature. The fluorescence spectra of the mixture were recorded.

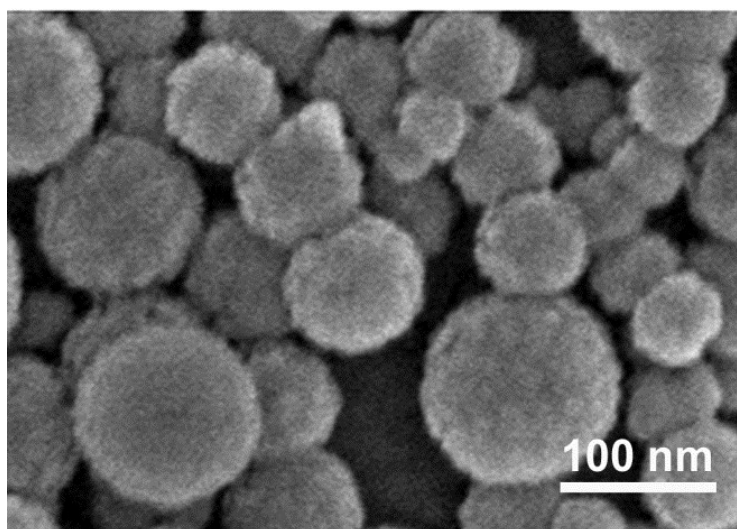

**Fig. S1.** SEM image of MSN1/4.

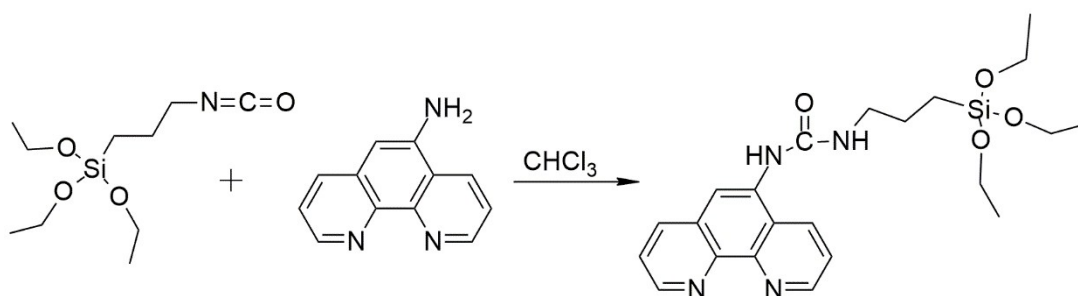

**Scheme S2.** Synthesis of Phen-Si.

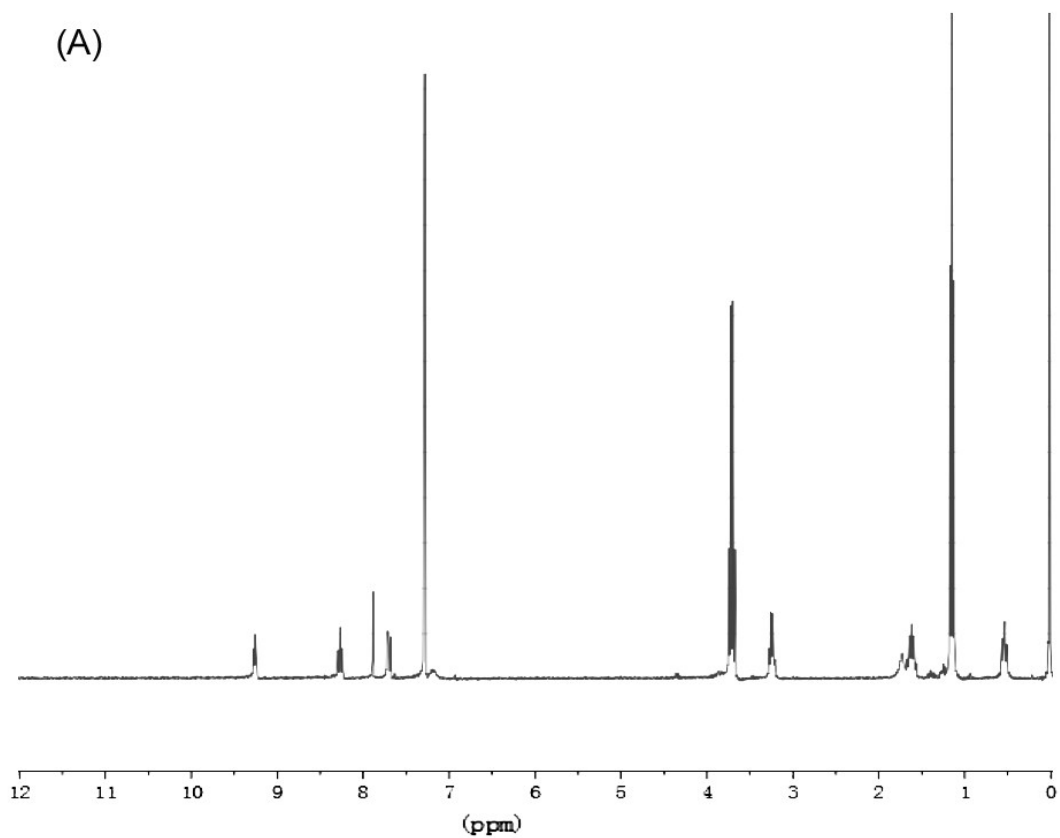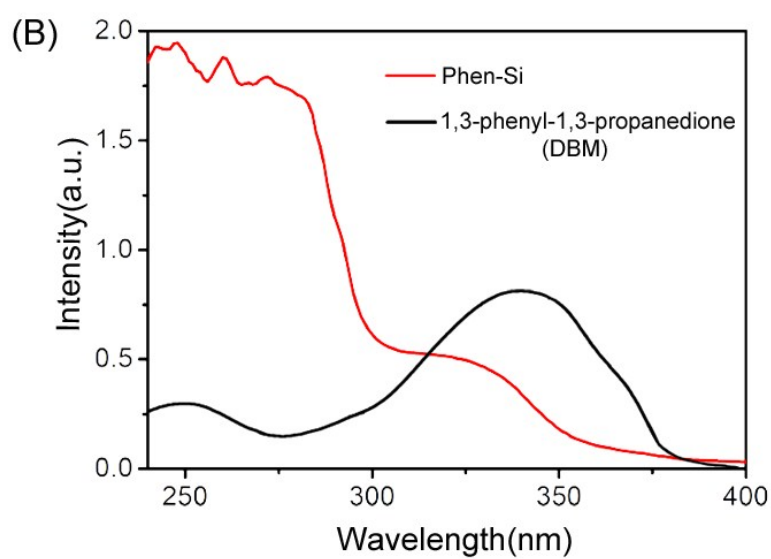

**Fig. S3.** (A)  $^1\text{H}$  NMR ( $\text{CDCl}_3$ ) spectrum of Phen-Si. In the  $^1\text{H}$  NMR spectrum:  $\delta =$  0.54 (2H, m); 1.13 (9H, t); 1.62 (2H, m); 3.22 (2H, m); 3.69 (6H, q); 7.13 (2H, s); 7.70 (2H, m); 7.87 (1H, s); 8.25 (2H, m); 9.25 (2H, m). (B) UV absorbance spectra of Phen-Si and 1,3-diphenyl-1,3-propanedione (DBM).

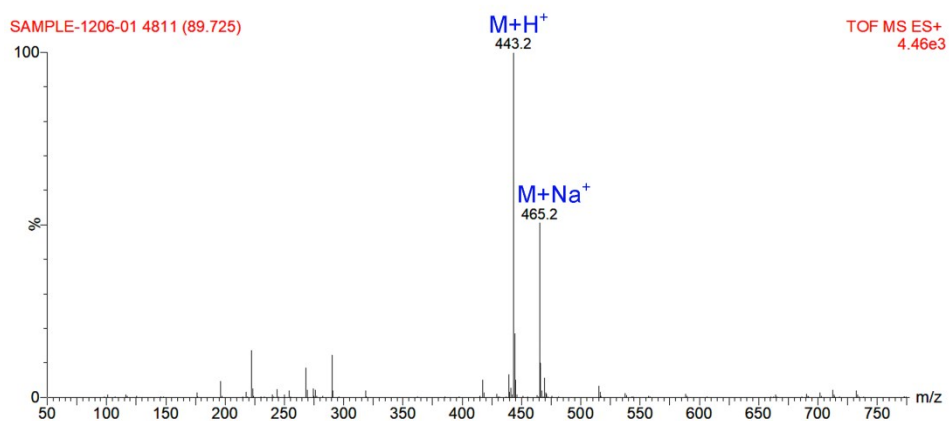

**Fig. S4.** ESI-TOF mass spectrum of Phen-Si. The calculated molecular weight of Phen-Si is: m/z 442.2 [M] ( $C_{22}H_{30}N_4O_4Si$ ). The tested ESI-MS: m/z 443 [M+H]<sup>+</sup>.

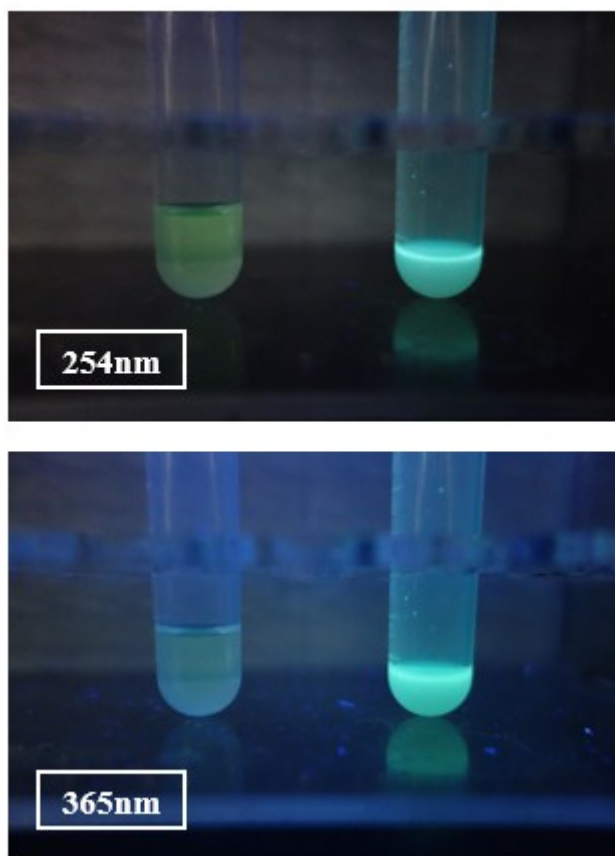

**Fig. S5.** Visible fluorescence of MSN-Tb2 and Phen-Tb irradiated under 365 nm light.

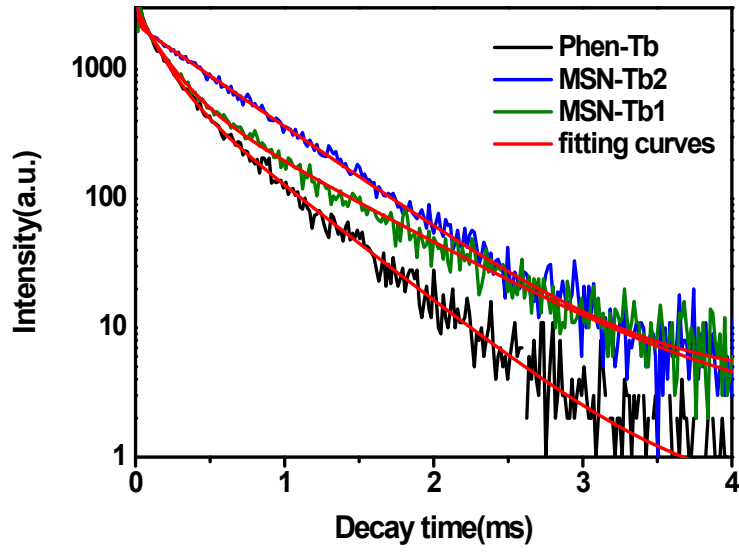

**Fig. S6.** Emission decay profiles of the MSN-Tbs.

Biexponential decay function obtained by fitting curve in Fig.S6 :

$$I = I_0 + A_1 \exp(-t/\tau_1) + A_2 \exp(-t/\tau_2) \quad (\text{Eq. S1})$$

where  $I$  is the luminescence intensity at time  $t$ ,  $\tau_1$  and  $\tau_2$  are the decay time,  $A_1$  and  $A_2$  are constants.<sup>1,2</sup>

The average lifetimes ( $\tau_{av}$ ) of each sample can be calculated by the formula :

$$\tau_{av} = (A_1 \tau_1^2 + A_2 \tau_2^2) / (A_1 \tau_1 + A_2 \tau_2) \quad (\text{Eq. S2})$$



**Table S1.** Time constants and average lifetime  $\tau$  of Tb and MSN-Tbs, respectively.

| Sample  | $\tau_1(\mu\text{s})$ | $A_1$   | $\tau_2(\mu\text{s})$ | $A_2$   | $I_0$  | $\tau_{\text{av}}(\mu\text{s})$ |
|---------|-----------------------|---------|-----------------------|---------|--------|---------------------------------|
| Tb      | 144.3                 | 2093.62 | 485.3                 | 981.81  | 0.4946 | 353.0                           |
| MSN-Tb1 | 694.5                 | 787.91  | 176.3                 | 2023.07 | 2.1158 | 490.0                           |
| MSN-Tb2 | 548.4                 | 2219.13 | 9.6                   | 4460.62 | 4.0655 | 530.1                           |

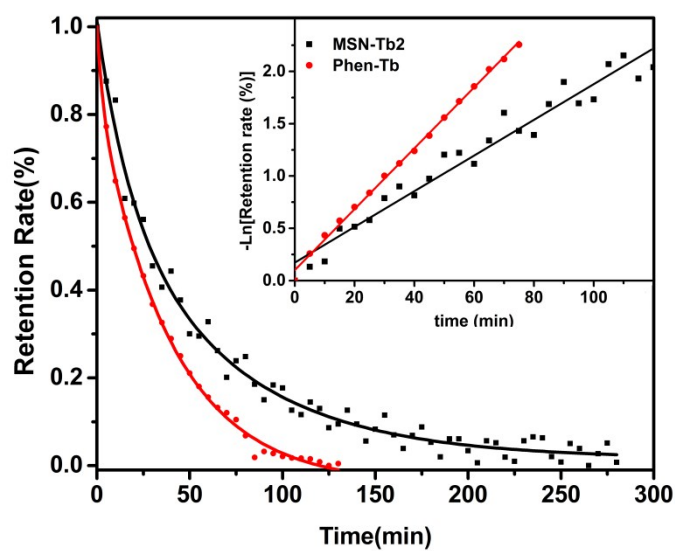

**Fig. S7.** Fluorescence intensity of Phen-Tb and MSN-Tb2 under UV light as a function of time.

**Table S2.** Kinetic parameters related to fluorescence stability. the first-order kinetics formula obtained according to the Langmuir–Hinshelwood (L–H) model .<sup>3</sup>

| Sample  | first-order kinetic equation | Rate constant (min <sup>-1</sup> ) | R <sup>2</sup> |
|---------|------------------------------|------------------------------------|----------------|
| MSN-Tb2 | Y=0.0171X+0.1724             | 0.0171                             | 0.9571         |
| Phen-Tb | Y=0.0291X+0.1007             | 0.0291                             | 0.9974         |

$$R_0 = \left( \frac{9000 \times \ln(10) k^2 Q_D}{128 \pi^5 n^4 N_A} J \right)^{1/6} \quad (\text{Eq. S3})$$

$$E = 1 - \frac{F}{F_0} = \frac{R_0^6}{R_0^6 + r^6} \quad (\text{Eq. S4})$$

Where  $k^2$  is the dipole orientation factor, usually assumed to be 2/3.<sup>4</sup>  $n$  is the refractive index of the medium, 1.4 for biomolecules in aqueous solution.<sup>5</sup>  $Q_D$  is the fluorescence quantum yield of the donor ( $Q_D = 0.36$ ).  $J$  is the spectral overlap integral. We calculate the value of  $J$ , which is  $4.6 \times 10^{-14} \text{ M}^{-1} \cdot \text{cm}^3$ .  $N_A$  is Avogadro's number. Also,  $F$  and  $F_0$  are the fluorescence intensities in the presence and absence of Ub-Rs, respectively.  $r$  is the binding distance between donor and receptor.

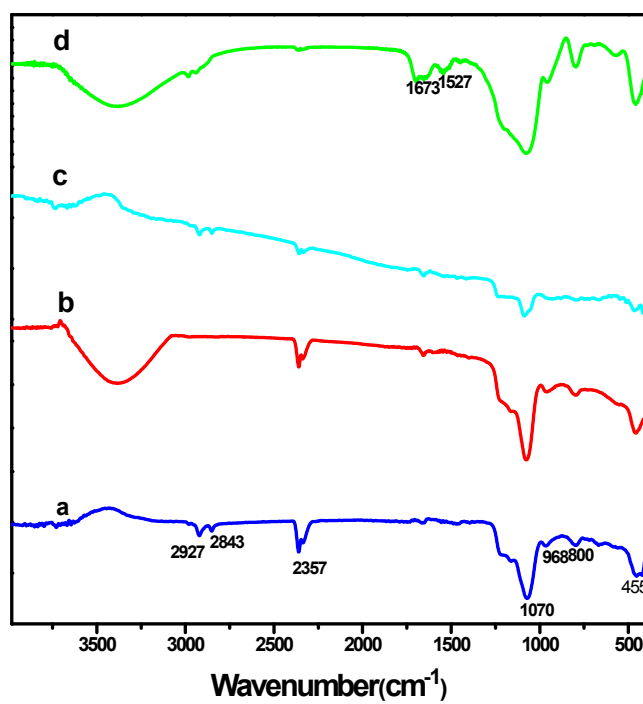

**Fig. S8.** FT-IR spectra of (a) MSN-CTAB, (b) MSN, (c) MSN-Phen2, (d) MSN-Tb2.

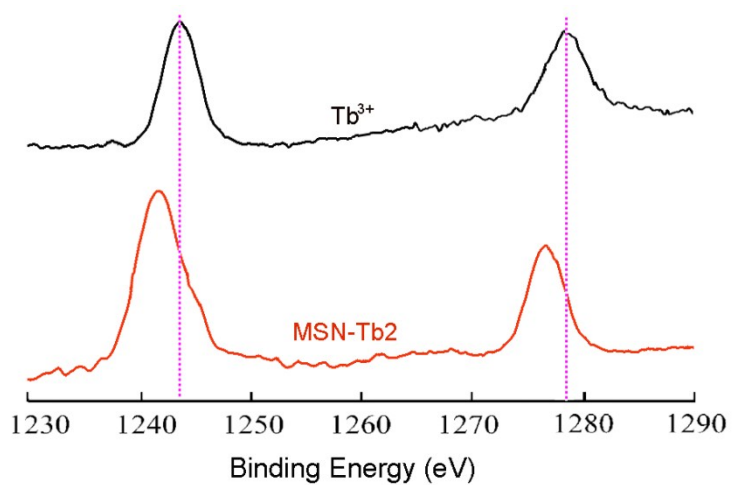

**Fig. S9.** XPS spectra of  $\text{TbCl}_3$  and MSN-Tb2.

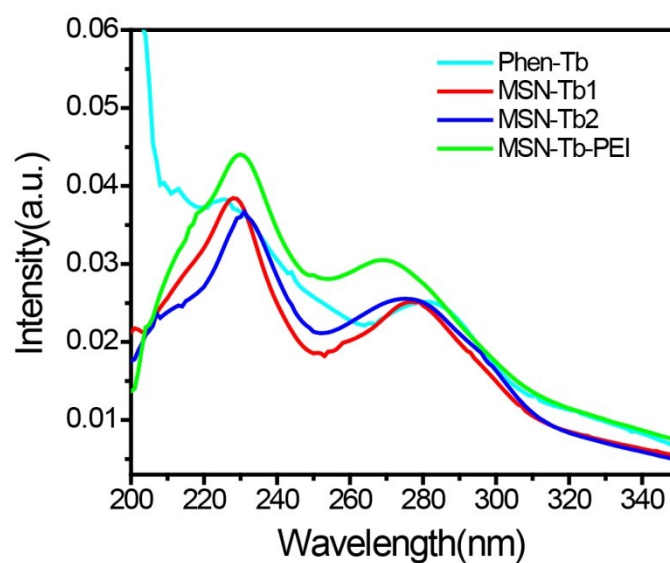

**Fig. S10.** UV-visible absorbance spectra of the products.

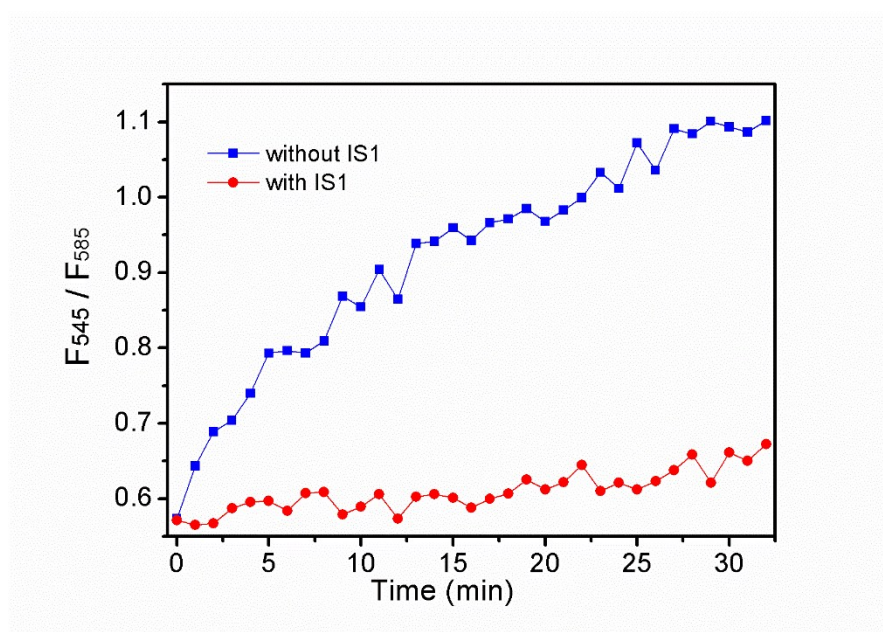

**Fig. S11.** Progress curve for the UCH-L1-catalyzed hydrolysis of MSN-Tb-UbR with and without IS1. The UCH-L1 concentration: 20 nM; the IS1 concentration: 25  $\mu$ M; and the MSN-Tb-UbR concentration: 5 mg·mL<sup>-1</sup>.

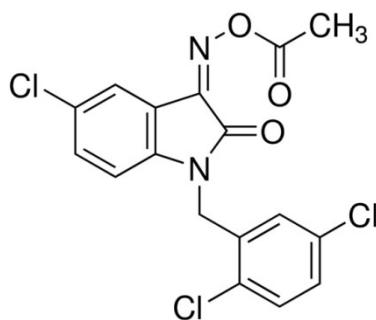

**Fig. S12.** UCH-L1 inhibitor IS-1 (an isatin *O*-acyl oxime compound)

## References

1. J. Wu, S. Shi, X. Wang, J. Li, R. Zong and W. Chen, *J. Mater. Chem. C*, 2014, **2**, 2786-2792.
2. G. B. Piland, J. J. Burdett, D. Kurunthu and C. J. Bardeen, *J. Phys. Chem. C*, 2013, **117**, 1224-1236.
3. X. Cheng, H. Liu, Q. Chen, J. Li and P. Wang, *J. Hazard. Mater.*, 2013, **254-255**, 141-148.
4. Z. Li, Z. li, L. Yang, Y. Xie, J. shi, R. Wang and J. Chang, *J. Fluoresc.*, 2015, **25**, 451-463.
5. Y. Chang, C. Cai, L. Li, J. Miao, E. Ucakturk, G. Li, M. Ly and R. J. Linhardt, *Anal. Chem.*, 2013, **85**, 9356-9362
